# Supplementary material for: A coral-like film of Ni@NiS with core–shell particles for the counter electrode of an efficient dye-sensitized solar cell
Source: Royal Society of Chemistry journal article supplement (doi:10.1039/c4ta00011k), 2014-01-01
Supplement: c4ta00011k1.pdf [file c4ta00011k1.pdf]

## Electronic Supplementary Information

### Coral-Like Film of Ni@NiS with Core-Shell Particles for the Counter Electrode of an Efficient Dye-Sensitized Solar Cell

Hui-Min Chuang,<sup>a,+</sup> Chun-Ting Li,<sup>a,+</sup> Min-Hsin Yeh,<sup>a</sup> Chuan-Pei Lee,<sup>a</sup> R. Vittal,<sup>a</sup> and Kuo-Chuan Ho<sup>a,b,\*</sup>

<sup>a</sup> Department of Chemical Engineering, National Taiwan University, Taipei 10617, Taiwan

<sup>b</sup> Institute of Polymer Science and Engineering, National Taiwan University, Taipei 10617, Taiwan

\* To whom correspondence should be addressed: [kcho@ntu.edu.tw](mailto:kcho@ntu.edu.tw) (K. C. Ho)

+ These authors contributed equally

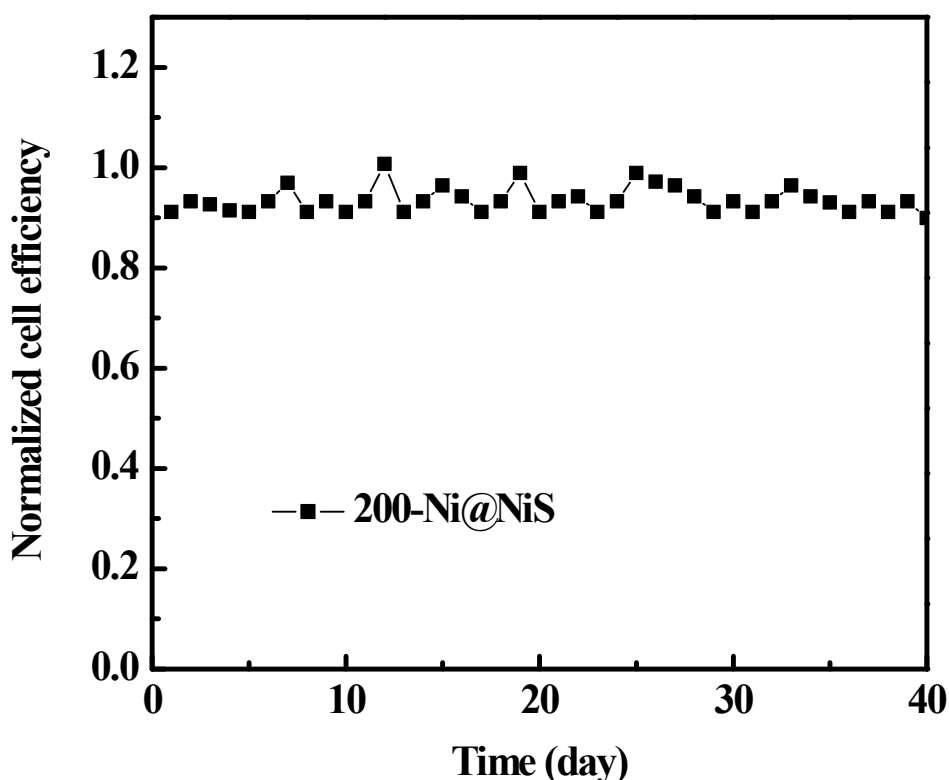

**Fig. S.1.** At-rest long-term stability data of the DSSC with 200-Ni@NiS as the counter electrode material in an ionic liquid electrolyte, containing 0.2 M I<sub>2</sub> and 0.5 M TBP in a mixture solvent of BMII/EMIBF<sub>4</sub> (volume ratio = 65/35), obtained at 100 mW cm<sup>-2</sup>.



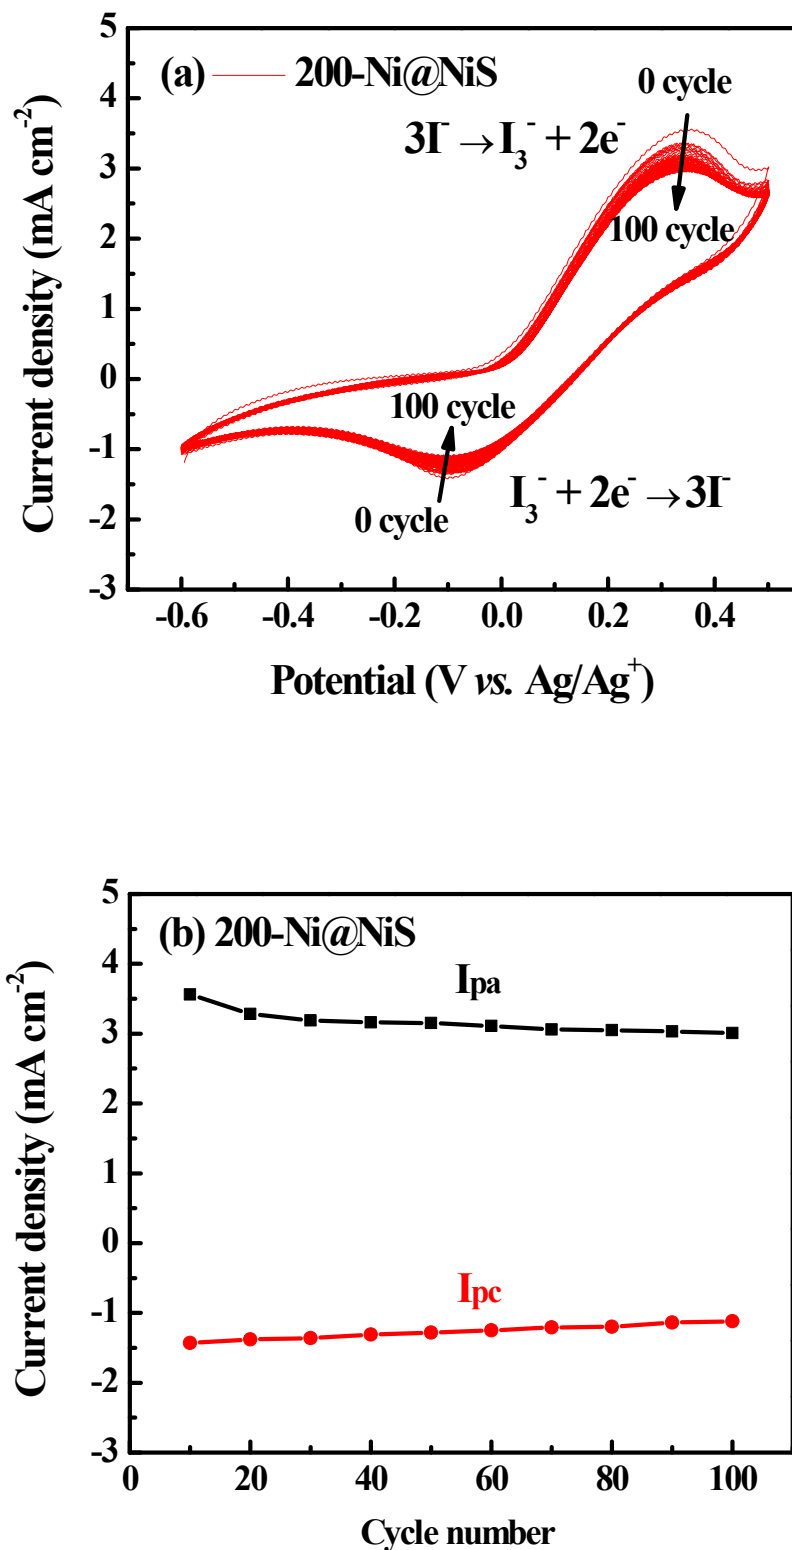

**Fig. S2.** (a) Cyclic voltammograms of the CE with 200-Ni@NiS, obtained for 100 cycles; (b) corresponding anodic and cathodic peak current densities ( $J_{pa}$  and  $J_{pc}$ , respectively) as functions of

number of cycles. The CVps were obtained in the electrolyte containing 10.0 mM LiI, 1.0 mM I<sub>2</sub>, and 0.1 M LiClO<sub>4</sub> in ACN, at a scan rate of 100 mV/s.
